# Supplementary material for: Towards a unified molecular mechanism for ligand-dependent activation of NR4A-RXR heterodimers
Source: eLife. 2026 Apr 30;14:RP106861. doi: 10.7554/eLife.106861 (PMC13132549; doi:10.7554/eLife.106861)
Supplement: Figure 2—source data 1. [file elife-106861-fig2-data1.xlsx]

## Sheet: Figure 2-source data 2
PA425	Rhein	Danthron	HX531	LG100754	UVI3003	BRF110	HX600	IRX4204	SR11237	9cRA	CD3254	Bexarotene	LG100268	DMSO
12116	11264	16457	15568	17410	16809	11817	26518	43795	39239	54797	44216	55177	40432	13862
10981	12389	8714	13606	14671	11686	15341	26814	41164	51239	57372	45756	49634	54848	12310
10345	13293	16565	16208	16847	20886	18284	23541	47830	39689	42600	63795	49896	60991	11313
13491	10678	13902	9461	15340	18644	20272	23421	40309	44151	36836	43811	50484	61411	13192
10357	15042	12974	16110	16634	12887	17116	31059	42049	57233	44207	44880	57680	51294	11638
11148	11937	12349	11385	15625	15757	15956	27438	38376	39556	49887	50657	51969	48822	13664
