# Supplementary material for: Towards a unified molecular mechanism for ligand-dependent activation of NR4A-RXR heterodimers
Source: eLife. 2026 Apr 30;14:RP106861. doi: 10.7554/eLife.106861 (PMC13132549; doi:10.7554/eLife.106861)
Supplement: Figure 2—source data 2. [file elife-106861-fig2-data2.xlsx]

## Sheet: Figure 2-source data 2
PA425	Rhein	Danthron	HX531	LG100754	UVI3003	BRF110	HX600	IRX4204	SR11237	9cRA	CD3254	Bexarotene	LG100268	DMSO
0.403	0.902	0.569	0.434	0.415	0.48	0.411	0.43	2.802	2.169	2.229	1.921	2.677	2.694	0.469
0.408	0.821	0.592	0.427	0.428	0.473	0.424	0.418	2.813	2.167	2.234	1.902	2.626	2.753	0.461
0.432	0.931	0.586	0.463	0.428	0.471	0.433	0.434	2.803	2.143	2.031	1.939	2.467	2.758	0.466
